# Supplementary material for: Host gastric corpus microenvironment facilitates Ascaris suum larval hatching and infection in a murine model
Source: PubMed Central journal article supplement (PMC10878500; doi:10.1371/journal.pntd.0011930), 2024-02-07
Supplement: pntd.0011930.s001.pdf [file pntd.0011930.s001.pdf]

**Supplement Figure 1**

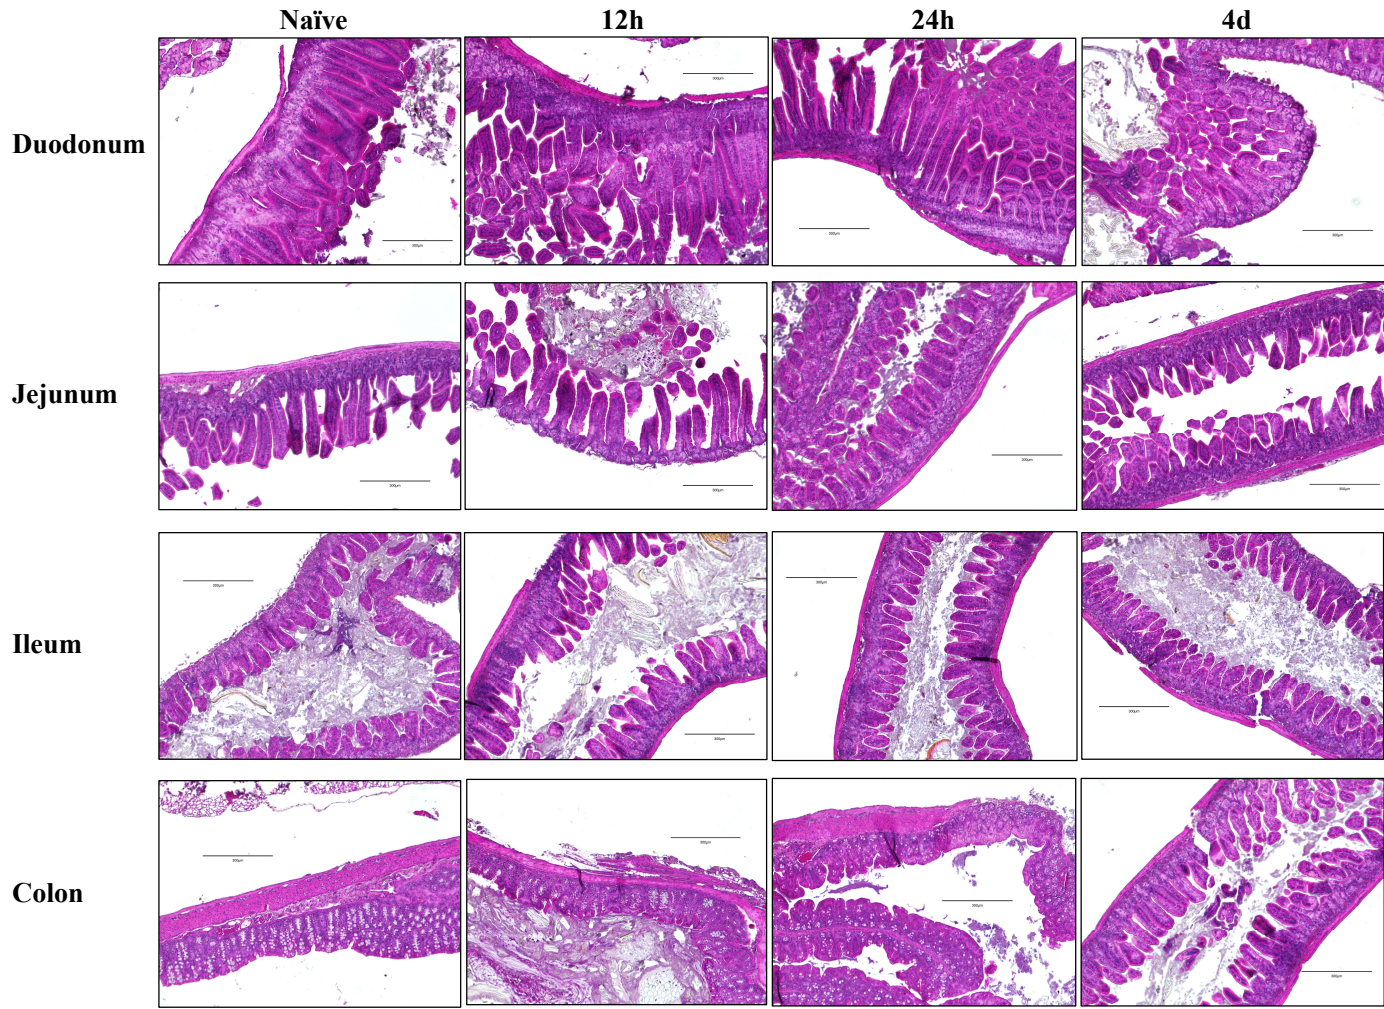

**Supplemental Figure 1: Intestine of mice post *Ascaris* larva infection.** Wildtype mice were oral gavaged with 2,500 *Ascaris* eggs and euthanized at 12 hours, 24 hours or 4 days post infection. H&E staining were carried out on sections of different intestine tissues.
