# Supplementary material for: Host gastric corpus microenvironment facilitates Ascaris suum larval hatching and infection in a murine model
Source: PubMed Central journal article supplement (PMC10878500; doi:10.1371/journal.pntd.0011930), 2024-02-07
Supplement: pntd.0011930.s002.pdf [file pntd.0011930.s002.pdf]

## Supplement Figure 2

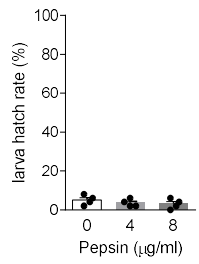

**Supplemental Figure 2: Pepsin does not induce *Ascaris* larva hatching.** *Ascaris* eggs are treated with 4 or 8 µg/ml of pepsin in pH=2 overnight. Larval hatch rate were then calculated.
