# Supplementary material for: Host gastric corpus microenvironment facilitates Ascaris suum larval hatching and infection in a murine model
Source: PubMed Central journal article supplement (PMC10878500; doi:10.1371/journal.pntd.0011930), 2024-02-07
Supplement: pntd.0011930.s003.pdf [file pntd.0011930.s003.pdf]

### Supplement Figure 3

|                     | Ctrl      | Trypsin  | Trypsin+Bile salt | Trypsin+Bile |
|---------------------|-----------|----------|-------------------|--------------|
| Larval hatch rate % | 0.315789% | 0.27897% | 0.506977%         | 0.217391%    |

**Supplemental Figure 1: *Ascaris* larva does not hatch in intestinal conditions.** *Ascaris* eggs are treated in pH=2 for 30 minutes and then in intestinal conditions overnight. Larval hatch rate were then calculated.
